# Supplementary material for: The Production of γ-Aminobutyric Acid from Free and Immobilized Cells of Levilactobacillus brevis Cultivated in Anaerobic and Aerobic Conditions
Source: MDPI journal article supplement (doi:10.3390/microorganisms10112184), 2022-11-03
Supplement: s1 [file s1]

**Title**

Production of  $\gamma$ -aminobutyric acid from free and immobilized cells of *Levilactobacillus brevis* cultivated in anaerobic and aerobic conditions

**Authors**

Teresa Zotta <sup>1,\*</sup>, Immacolata Faraone <sup>2,3</sup>, Marilisa Giavalisco <sup>1</sup>, Eugenio Parente <sup>1</sup>, Ludovica Lela <sup>2</sup>, Livia Vanessa Storti <sup>1</sup>, Annamaria Ricciardi <sup>1</sup>

**Affiliations**

<sup>1</sup> Scuola di Scienze Agrarie, Alimentari, Forestali ed Ambientali (SAFE), Università degli Studi della Basilicata, 85100 Potenza, Italy

<sup>2</sup> Dipartimento di Scienze (DIS), Università degli Studi della Basilicata, 85100 Potenza, Italy

<sup>3</sup> Spinoff BioActiPlant s.r.l., Viale Dell'ateneo Lucano 10, 85100 Potenza, Italy

\* Correspondence: [teresa.zotta@unibas.it](mailto:teresa.zotta@unibas.it); Tel +39-0971-205563.

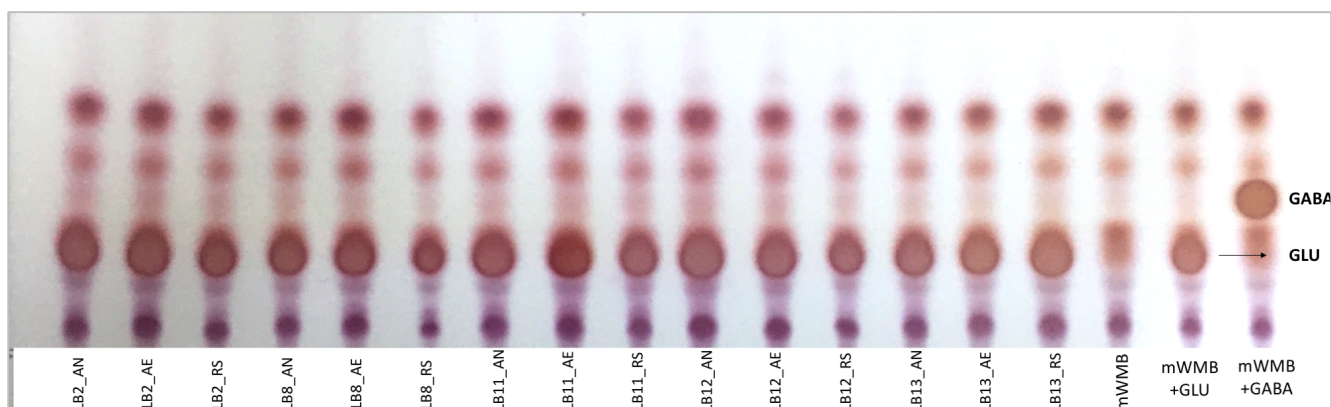

**Supplementary Figure S1.** Example of Thin Layer Chromatography (TLC) plate. Samples refer to the glutamate consumption and GABA production after 9 h of incubation in the growth condition described in section 2.3 and Table 1. mWMB+GLU and mWMB+GABA (used as controls) are, respectively, the mWMB media supplemented with 10 g/L of glutamate or GABA. Strain code: LB2 is PB13L; LB8 is B02; LB11 is B29; LB12 is F02; LB13 is B24.

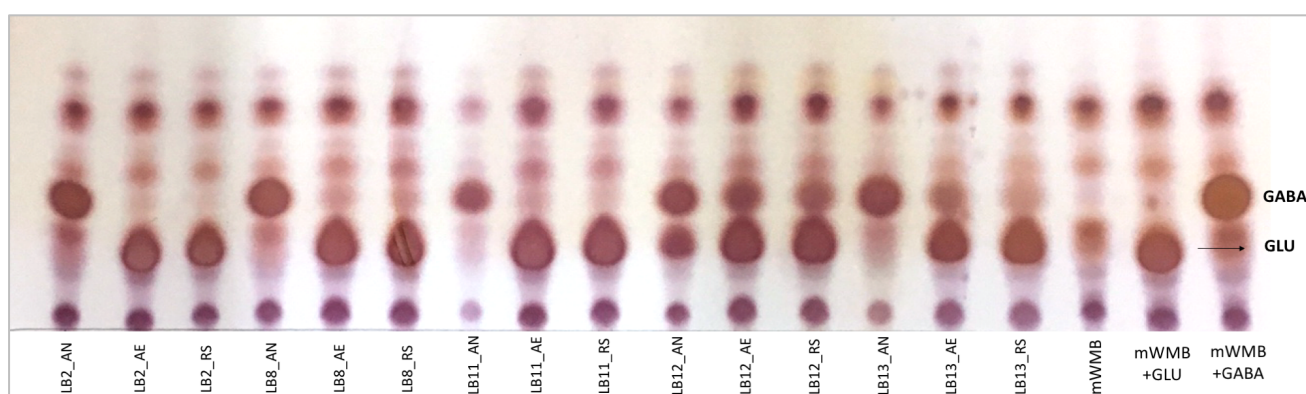

**Supplementary Figure S2.** Example of Thin Layer Chromatography (TLC) plate. Samples refer to the glutamate consumption and GABA production after 24 h of incubation in the growth condition described in section 2.3 and Table 1. mWMB+GLU and mWMB+GABA (used as controls) are, respectively, the mWMB media supplemented with 10 g/L of glutamate or GABA. Strain code: LB2 is PB13L; LB8 is B02; LB11 is B29; LB12 is F02; LB13 is B24.

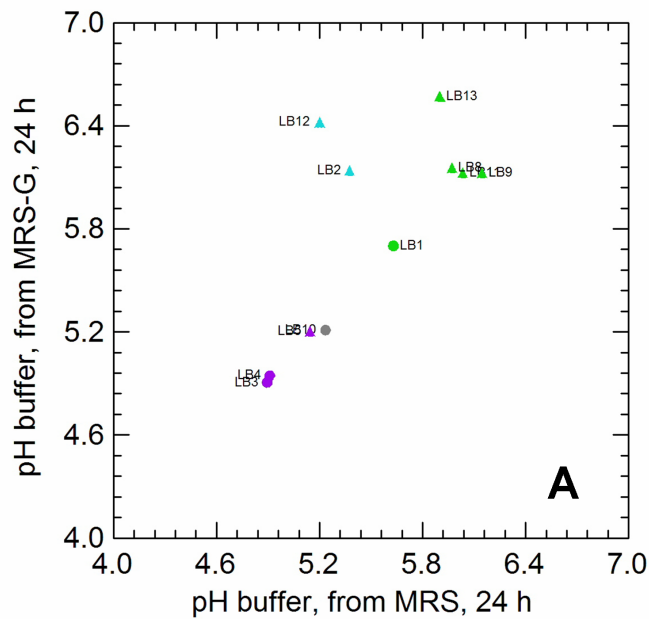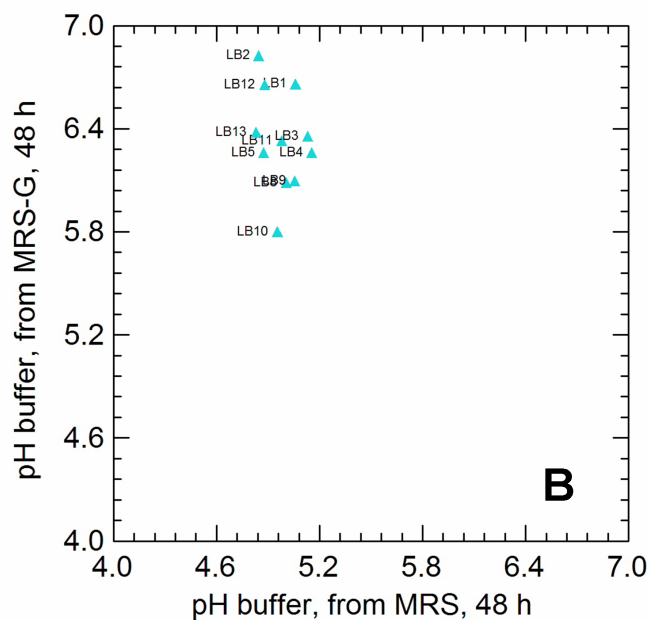

**Supplementary Figure S3.** Correlation between pH values measured in buffer system inoculated with *Levilactobacillus brevis* strains grown for 24 h (panel **A**;  $r = 0.728$ ) or 48 h (panel **B**;  $r = 0.285$ ) in unsupplemented MRS or MRS supplemented with 10 g/L MSG (MRS-G). Colour of symbols indicates the range of colour and pH values of the reaction buffer inoculated with cells grown in MRS or MRS-G: purple, no colour change ( $\text{pH} < 5.0$ ) in presence of both MRS and MRS-G cultures; grey, colour change from purple to grey ( $5.0 < \text{pH} < 5.4$ ) in presence of both MRS and MRS-G cultures; green, colour change from grey to green ( $\text{pH} > 5.4$ ) in presence of both MRS and MRS-G cultures; light blue, colour change from grey to green ( $\text{pH} > 5.4$ ) only in presence of MRS-G cultures. Symbols are referred to the GABA-spots detected each strain after 24 h and 48 h of incubation, as described in **Figures 1A and 1C**, respectively. Strain code: LB1 is PA11S; LB2 is PB13L; LB3 is TO62; LB4 is A7; LB5 is A4; LB8 is B02; LB9 is B17; LB10 is B25; LB11 is B29; LB12 is F02; LB13 is B24.

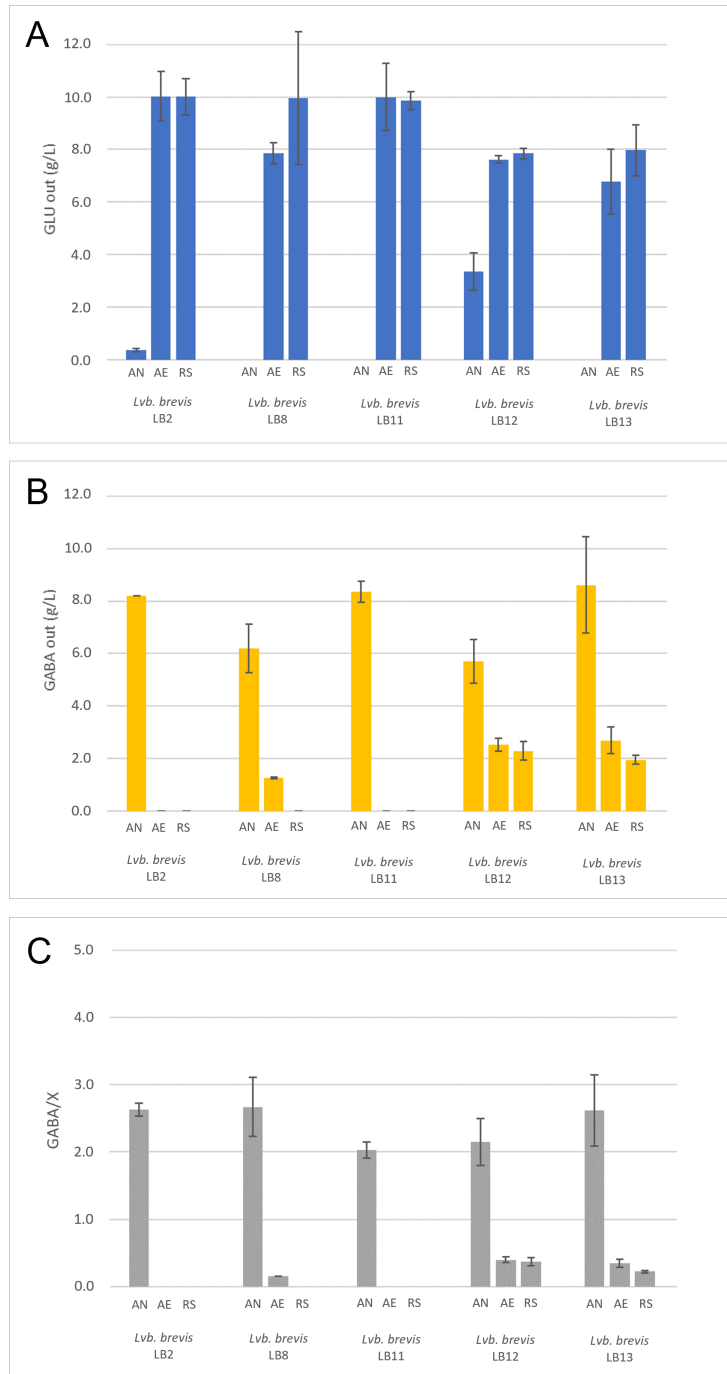

**Supplementary Figure S4.** Panel A: glutamate (GLU out, g/L) measured with RP-HPLC in culture supernatants after 24 h of incubation of 5 selected *Lvb. brevis* strains (LB2, LB8, LB11, LB12, LB13); panel B: GABA produced (g/L) and extruded by cells and measured with RP-HPLC in culture supernatants after 24 h of incubation of 5 selected *Lvb. brevis* strains (LB2, LB8, LB11, LB12, LB13); panel C: specific GABA production (GABA/X, g/L), calculated as ratio between GABA concentration and biomass production (g/L).

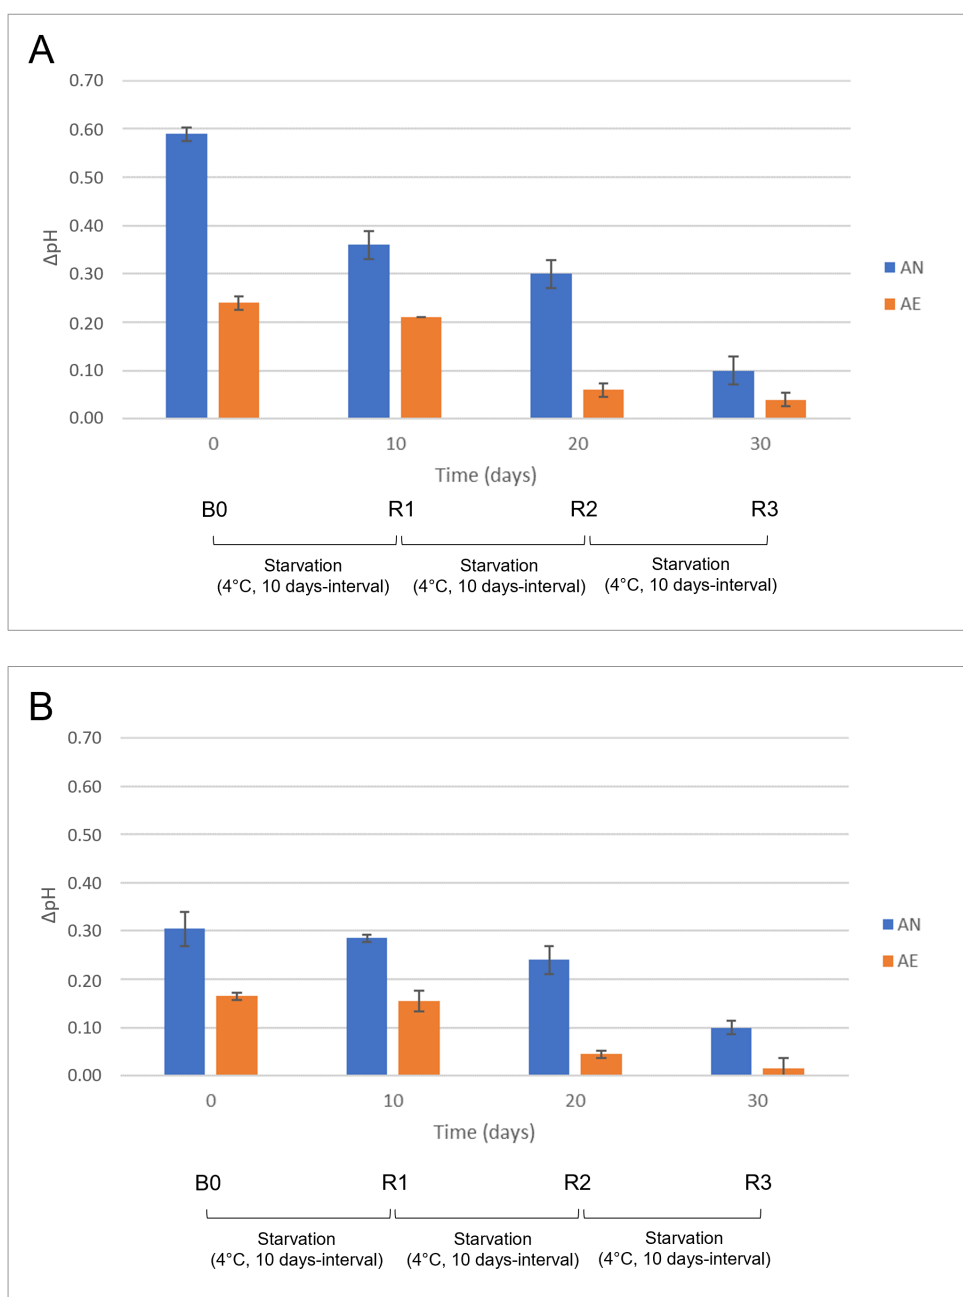

**Supplementary Figure S5.** Increase of pH measured in the reaction buffer after 4 h of incubation at 37°C (sections 2.4.1) for free (panel **A**) and immobilized (panel **B**) cells. Cell condition (free, immobilized) and growth (aerobiosis, anaerobiosis) used for biocatalysis are described in sections 2.4.1 and 2.4.2. Bioconversion and recycling steps: B0, first bioconversion step (time 0 days) carried-out with fresh cells; R1, R2 and R3: recycling steps carried-out at 10-days interval (up to 30 days) with resting cells (see section 2.4.3); E, end of starvation and bioconversion steps.

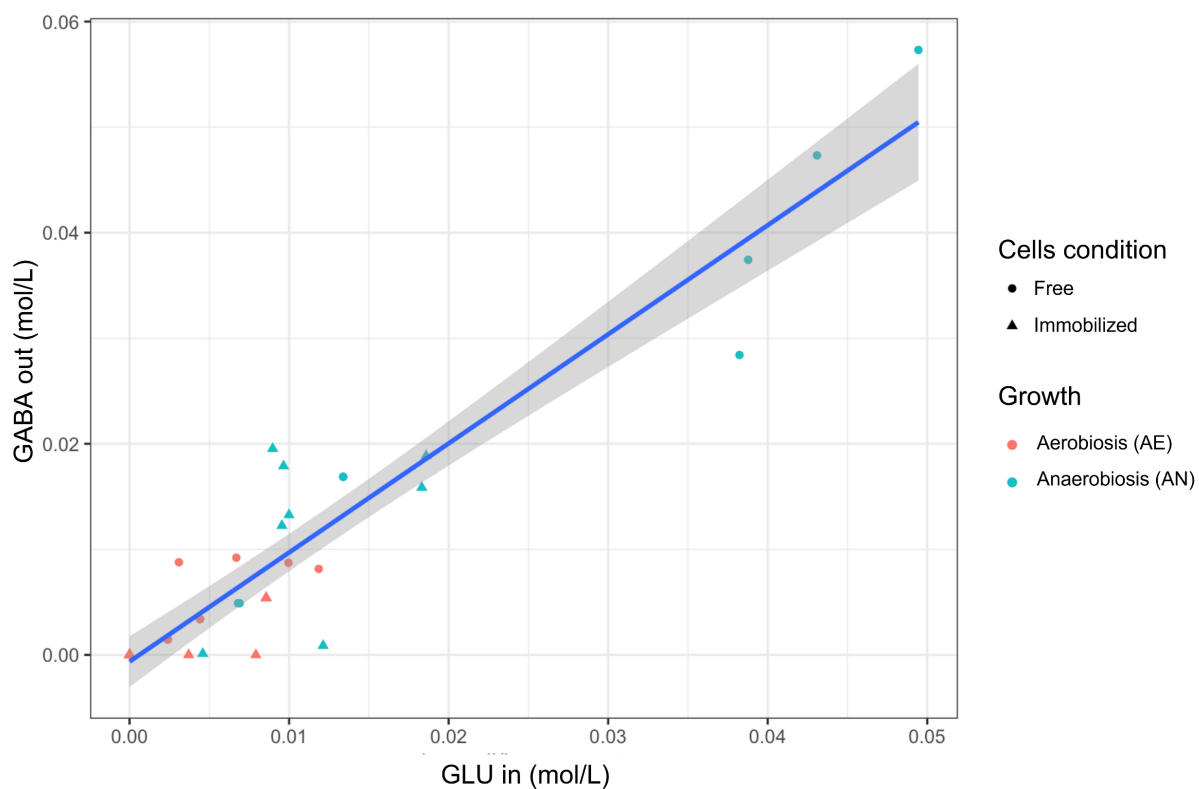

**Supplementary Figure S6.** Correlation between GABA produced (mol/L) and extruded by cells and glutamate uptaken by cells (mol/L) and available for GLU/GABA bioconversion. Cell condition (free, immobilized) and growth (aerobiosis, anaerobiosis) used for biocatalysis are described in sections 2.4.1 and 2.4.2.

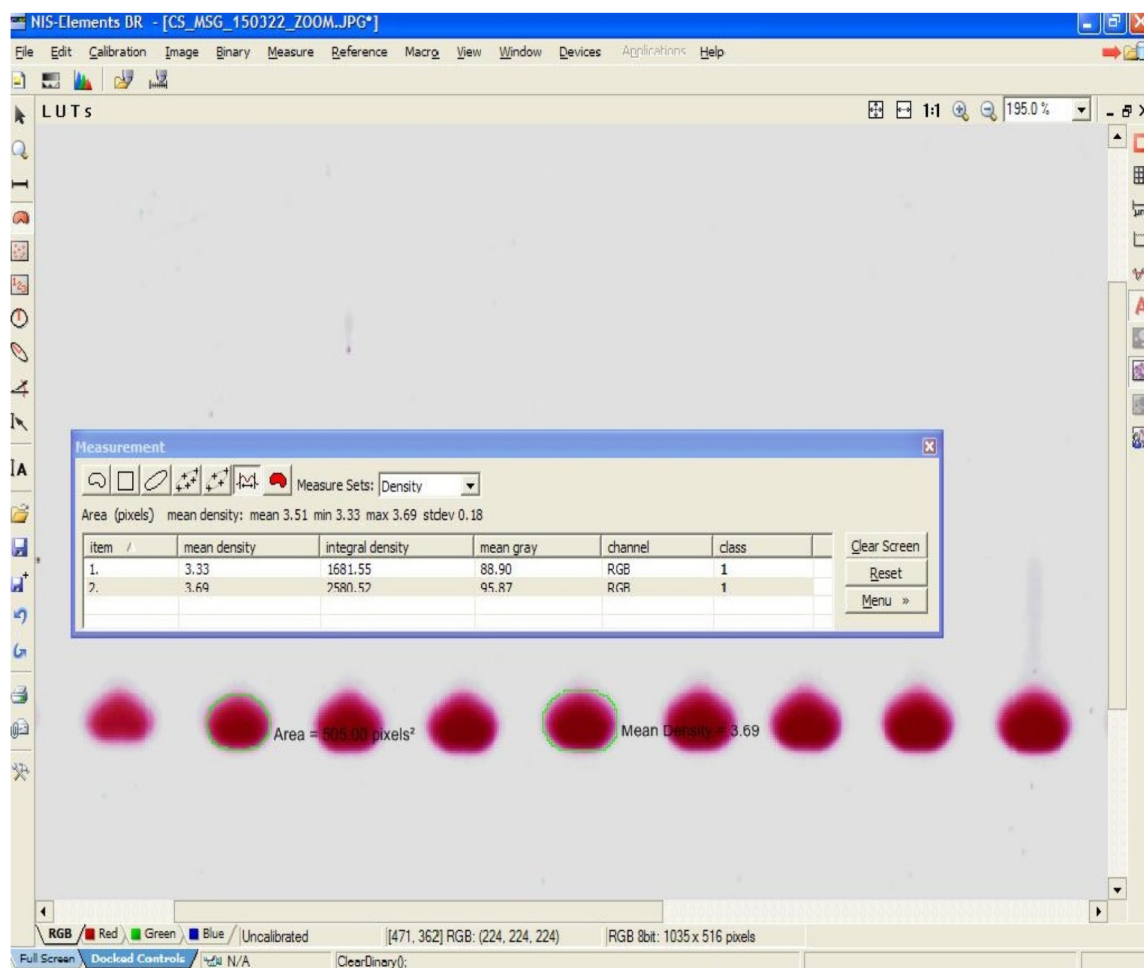

**Supplementary Figure S7.** Example of the image analysis of a TLC plate (experiment in buffer system; sections 2.4.2 and 2.4.3.) by using the NIS-Element BR v2.10 software (Nikon, The Netherlands). Data from image analysis were correlated with RP-HPLC data.
